# Supplementary material
Source: PubMed Central journal article supplement (PMC2808367)
Supplement: emboj2009318s2.pdf [file emboj2009318s2.pdf]

Manuscript EMBO-2008-70157

## **Social isolation stress induces ATF-7 phosphorylation and impairs silencing of the 5-HT 5B receptor gene**

Toshio Maekawa, Seungjoon Kim, Daisuke Nakai, Chieko Makino, Tsuyoshi Takagi, Hiroo Ogura, Kazuyuki Yamada, Bruno Chatton

*Corresponding author: Shunsuke Ishii, RIKEN Tsukuba Institute*

---

### **Review timeline:**

Submission date:  
Accepted:

12 December 2008  
08 October 2009

---

### **Transaction Report:**

An earlier version of this manuscript was submitted to *The EMBO Journal* and assessed before January 2009. As the original review of the manuscript therefore predates the implementation of *The EMBO Journal's* transparent review process policy, no Review Process File is available with this article.
